# Supplementary material for: Contraceptive Use and Method Preferences among HIV Positive Women in Ethiopia: A Systematic Review and Meta‐analysis
Source: Hindawi journal article supplement (doi:10.1155/2020/6465242), 2020-01-01
Supplement: f1 [file 6465242.f1.pdf]

Table S1. Quality assessment of articles (NOS for cross sectional study)

| Studies                  | Selection                     |                        |                            |                                                        | Comparability | Outcome                                                                                                                                |                                      | Total score |
|--------------------------|-------------------------------|------------------------|----------------------------|--------------------------------------------------------|---------------|----------------------------------------------------------------------------------------------------------------------------------------|--------------------------------------|-------------|
|                          | Representativeness<br><br>(1) | Sample size<br><br>(1) | Non-respondents<br><br>(1) | Ascertainment of the exposure (risk factor)<br><br>(2) |               | The subjects in different outcome groups are comparable, based on the study design or analysis. Confounding factors are controlled (2) | Assessment of the outcome<br><br>(2) |             |
| Derek et al.(12)         | *                             | *                      | *                          | **                                                     | *             | **                                                                                                                                     | *                                    | 9           |
| Kebede et al.(23)        | *                             | *                      | *                          | **                                                     | *             | *                                                                                                                                      | *                                    | 8           |
| Kebede et al.(24)        | *                             | *                      | *                          | **                                                     | *             | **                                                                                                                                     | *                                    | 9           |
| Alene and Atalell(10)    | *                             | *                      | *                          | *                                                      | *             | **                                                                                                                                     | *                                    | 8           |
| Mersha et al.(25)        | *                             | *                      | *                          | **                                                     | *             | **                                                                                                                                     | *                                    | 9           |
| Melaku YA, Zeleke EG(26) | *                             | *                      | *                          | **                                                     | *             | **                                                                                                                                     | *                                    | 9           |
| Berhane et al.(11)       | *                             | *                      | *                          | **                                                     | *             | **                                                                                                                                     | *                                    | 9           |
| Lemeneh T.(27)           | *                             | *                      | *                          | **                                                     | *             | **                                                                                                                                     | *                                    | 9           |
| Mitiku K.(13)            | *                             | *                      | *                          | **                                                     | *             | **                                                                                                                                     | *                                    | 9           |
| Demissie & Tolossa(28)   | *                             | *                      | *                          | **                                                     | *             | **                                                                                                                                     | *                                    | 9           |
| Ayalew et al.(29)        | *                             | *                      | *                          | *                                                      | *             | *                                                                                                                                      | *                                    | 7           |
| Zewdie et al.(30)        | *                             | *                      | *                          | **                                                     | *             | **                                                                                                                                     | *                                    | 8           |
| Abeje & Motbaynor(31)    | *                             | *                      | *                          | **                                                     | *             | **                                                                                                                                     | *                                    | 9           |
| Asfaw & Gashe(32)        | *                             | *                      | *                          | **                                                     | *             | *                                                                                                                                      | *                                    | 8           |
| Polisi et al.(33)        | *                             | *                      | *                          | *                                                      | *             | **                                                                                                                                     | *                                    | 8           |

|                     |   |   |   |    |   |    |   |   |
|---------------------|---|---|---|----|---|----|---|---|
| Abubeker et al.(34) | * | * | * | ** | * | *  | * | 8 |
| Lemma &Mekonnen(35) | * | * | * | ** | * | ** | * | 9 |
| Worke et al.(14)    | * | * | * | *  | * | ** | * | 8 |
| Sufa A.(36)         | * | * | * | ** | * | ** | * | 9 |
